# Supplementary material for: Genome-wide association study identifies key F-box genes linked to ethylene responsiveness and root growth in rice (Oryza sativa L.)
Source: PubMed Central journal article supplement (PMC11688335; doi:10.3389/fpls.2024.1501533), 2024-12-18
Supplement: DataSheet2.pdf [file DataSheet2.pdf]

## *Supplementary Material*

**Supplementary Table 1.** List of rice accessions used in this study with code, information and phenotypic data.

| <b>Taxa</b> | <b>Name</b>                 | <b>Ecotype</b> | <b>Type</b>      | <b>Origin</b> | <b>%RLR</b> |
|-------------|-----------------------------|----------------|------------------|---------------|-------------|
| W00025      | Jao Hawm Nin                | Indica         | Improved variety | Thailand      | 64.401      |
| W00039      | KD                          | Indica         | Unknown          | Thailand      | 76.735      |
| W00053      | PSL85063-9-1-2              | Indica         | Landrace         | India         | 72.465      |
| W00055      | Nahng Cha-lawng             | Indica         | Landrace         | Thailand      | 64.278      |
| W00056      | RD69 (Thabthim Chumphae)    | Indica         | Improved variety | Thailand      | 58.457      |
| W00059      | Khao Nok                    | Indica         | Landrace         | Thailand      | 79.285      |
| W00060      | Man Ped 215-33-65           | Indica         | Landrace         | Myanmar       | 73.454      |
| W00061      | BENARA                      | Indica         | Landrace         | Unknown       | 75.989      |
| W00062      | Pinkaset 4                  | Indica         | Improved variety | Thailand      | 65.616      |
| W00063      | Khao Jao Hawm Phitsanulok 1 | Indica         | Improved variety | Thailand      | 71.477      |
| W00065      | Daw Mei                     |                | Landrace         | Thailand      | 67.839      |
| W00067      | CHEMPAN                     | Indica         | Landrace         | Unknown       | 60.411      |
| W00068      | Khao Jao Hawm Supanburi     | Indica         | Improved variety | Thailand      | 70.336      |
| W00069      | RD51                        | Indica         | Improved variety | Thailand      | 64.833      |
| W00071      | T6-6                        | Indica         | Improved variety | Thailand      | 62.652      |
| W00072      | IR60                        | Indica         | Improved variety | IRRI          | 67.665      |
| W00074      | Khao Gaw Diaw 35            | Indica         | Landrace         | Thailand      | 76.810      |
| W00075      | Surin1                      | Indica         | Improved variety | Thailand      | 70.705      |
| W00076      | CSSL-Chr1 (11)              | Indica         | Improved variety | Thailand      | 71.064      |
| W00078      | MeeKauk                     | Indica         | Landrace         | Thailand      | 63.240      |

|        |                              |        |                  |          |        |
|--------|------------------------------|--------|------------------|----------|--------|
| W00079 | HomMali841                   | Indica | Improved variety | Thailand | 70.541 |
| W00080 | Khao Jao Hawm Khlong Luang 1 | Indica | Improved variety | Thailand | 73.037 |
| W00081 | RD33                         | Indica | Improved variety | Thailand | 78.056 |
| W00084 | Khao Bahn Pong 132           | Indica | Landrace         | Thailand | 53.466 |
| W00086 | Khem Tawng Phatthalung       | Indica | Landrace         | Thailand | 63.503 |
| W00087 | Supan Buri 3                 | Indica | Improved variety | Thailand | 68.985 |
| W00089 | Plai Ngahm Prachinburi       | Indica | Landrace         | Thailand | 69.841 |
| W00090 | IR58                         | Indica | Improved variety | IRRI     | 72.311 |
| W00091 | CSSL-Chr1 (16)               | Indica | Improved variety | Thailand | 67.621 |
| W00092 | Improved Sinthulette-SalTol  | Indica | Landrace         | Thailand | 59.134 |
| W00093 | Thunyasirin                  | Indica | Improved variety | Thailand | 68.388 |
| W00094 | RD29 (Chai Nat 80)           | Indica | Improved variety | Thailand | 66.092 |
| W00096 | Phitsanulok 80               | Indica | Improved variety | Thailand | 82.979 |
| W00097 | IR40                         | Indica | Improved variety | IRRI     | 59.062 |
| W00101 | Hawm Cholasit                | Indica | Improved variety | Thailand | 64.558 |
| W00102 | RD-MAEJO2                    | Indica | Improved variety | Thailand | 59.305 |
| W00103 | CNTRLR82006-KSR-2-7          | Indica | Improved variety | Thailand | 68.383 |
| W00104 | RD43                         | Indica | Improved variety | Thailand | 79.199 |
| W00105 | Dee Ngu Lueam                | Indica | Landrace         | Thailand | 55.309 |
| W00106 | Mu9962                       | Indica | Improved variety | Thailand | 62.096 |
| W00107 | RD49                         | Indica | Improved variety | Thailand | 66.197 |

|        |                |        |                  |          |        |
|--------|----------------|--------|------------------|----------|--------|
| W00108 | RD7            | Indica | Improved variety | Thailand | 81.307 |
| W00109 | Supan Buri 2   | Indica | Improved variety | Thailand | 70.200 |
| W00110 | RD41           | Indica | Improved variety | Thailand | 61.806 |
| W00111 | RD4            | Indica | Improved variety | Thailand | 68.638 |
| W00112 | Supan Buri 1   | Indica | Improved variety | Thailand | 68.334 |
| W00113 | RD21           | Indica | Improved variety | Thailand | 78.412 |
| W00114 | Pathum Thani 1 | Indica | Improved variety | Thailand | 54.957 |
| W00116 | 1094-61        | Indica | Improved variety | Thailand | 63.801 |
| W00117 | BA7            | Indica | Landrace         | Unknown  | 61.669 |
| W00118 | Basmati 370    | Indica | Improved variety | India    | 75.521 |
| W00121 | FL496          | Indica | Improved variety | IRRI     | 76.096 |
| W00122 | FR13A          | Indica | Landrace         | India    | 73.257 |
| W00123 | HomMali803-1   | Indica | Improved variety | Thailand | 68.378 |
| W00124 | HomMali803-2   | Indica | Improved variety | Thailand | 81.840 |
| W00125 | HomMali821     | Indica | Improved variety | Thailand | 72.517 |
| W00126 | IR1188         | Indica | Improved variety | Unknown  | 77.322 |
| W00127 | IR64           | Indica | Improved variety | IRRI     | 69.002 |
| W00128 | IR72           | Indica | Improved variety | IRRI     | 64.643 |
| W00131 | PK1-PY-BLB-2   | Indica | Landrace         | Thailand | 78.358 |
| W00134 | Niaw Ubon1     | Indica | Improved variety | Thailand | 55.420 |
| W00136 | RD14           | Indica | Improved variety | Thailand | 59.484 |

|        |                   |        |                  |           |        |
|--------|-------------------|--------|------------------|-----------|--------|
| W00137 | RD23              | Indica | Improved variety | Thailand  | 78.649 |
| W00140 | Daw Sahm Deuan    | Indica | Landrace         | Thailand  | 70.591 |
| W00141 | Nahng Khiaw       | Indica | Landrace         | Thailand  | 52.247 |
| W00144 | Supan Buri 4      | Indica | Improved variety | Thailand  | 58.747 |
| W00145 | Hawm Poo Khiaw    | Indica | Landrace         | Thailand  | 70.560 |
| W00146 | Hawm Supan        | Indica | Improved variety | Thailand  | 71.216 |
| W00154 | Kalubala Vee      | Indica | Landrace         | Sri Lanka | 64.478 |
| W00156 | Koo Mueang        | Indica | Landrace         | Thailand  | 66.524 |
| W00157 | Chaw Ma-kawk      | Indica | Landrace         | Thailand  | 65.516 |
| W00158 | Dawk Mai          | Indica | Landrace         | Thailand  | 69.674 |
| W00159 | Ta Pow Lom        | Indica | Landrace         | Thailand  | 71.031 |
| W00160 | Tah Ban           | Indica | Landrace         | Thailand  | 67.380 |
| W00161 | Tawng Rahk Sai    | Indica | Landrace         | Thailand  | 56.886 |
| W00162 | PraTan Bahn Boong | Indica | Landrace         | Thailand  | 62.418 |
| W00164 | Mueang Ngah       | Indica | Landrace         | Lao PDR   | 59.626 |
| W00165 | Rueng Diaw        | Indica | Landrace         | Thailand  | 61.073 |
| W00166 | Lao Taeg          | Indica | Landrace         | Thailand  | 61.567 |
| W00170 | DULAR(GS.20018)   | Indica | Landrace         | Thailand  | 68.274 |
| W00172 | Hom Soo Tabut     | Indica | Landrace         | Thailand  | 78.173 |
| W00173 | 299 Hom Lanna     | Indica | Improved variety | Thailand  | 65.259 |
| W00174 | 716 54R           | Indica | Improved variety | Unknown   | 69.399 |
| W00175 | Abhaya            | Indica | Improved variety | Unknown   | 73.047 |
| W00178 | DH103             | Indica | Improved variety | Unknown   | 64.817 |
| W00179 | DH212             | Indica | Improved variety | Unknown   | 57.419 |
| W00180 | DV85              | Indica | Improved variety | Unknown   | 66.660 |
| W00181 | FL530             | Indica | Improved variety | Unknown   | 69.292 |

|        |                           |        |                  |          |        |
|--------|---------------------------|--------|------------------|----------|--------|
| W00183 | HomMali805                | Indica | Improved variety | Thailand | 63.119 |
| W00185 | IR49830                   | Indica | Improved variety | IRRI     | 64.358 |
| W00186 | IR53936                   | Indica | Improved variety | IRRI     | 66.989 |
| W00187 | IR57514                   | Indica | Improved variety | IRRI     | 79.525 |
| W00188 | IR62266                   | Indica | Improved variety | IRRI     | 76.468 |
| W00189 | IWS10                     | Indica | Improved variety | Thailand | 77.257 |
| W00190 | Jasmine IR57514 (BC4F7)   | Indica | Improved variety | Thailand | 67.817 |
| W00191 | KDML105-PlusIII           | Indica | Improved variety | Thailand | 61.699 |
| W00192 | MNTK 75                   | Indica | Landrace         | India    | 75.562 |
| W00194 | No.51-PSL                 | Indica | Landrace         | India    | 69.017 |
| W00196 | PTB33                     | Indica | Improved variety | #N/A     | 59.256 |
| W00197 | Rathu heenati             | Indica | Improved variety | #N/A     | 75.526 |
| W00198 | TDK1_Sub1                 | Indica | Improved variety | Lao PDR  | 59.052 |
| W00199 | Gao Rueng 88              | Indica | Landrace         | Thailand | 64.425 |
| W00201 | Khiaw Leu                 | Indica | Landrace         | Thailand | 64.930 |
| W00204 | Chiang Pattalung          | Indica | Landrace         | Thailand | 55.371 |
| W00205 | Leb Nok Pattani           | Indica | Landrace         | Thailand | 69.801 |
| W00207 | Shian On                  | Indica | Landrace         | Thailand | 67.120 |
| W00208 | Niaw Khiaw Ngoo (GS.7545) | Indica | Landrace         | Thailand | 71.580 |
| W00209 | Niaw Dam                  | Indica | Landrace         | Thailand | 74.552 |
| W00210 | Niaw San-pah Tawng        | Indica | Improved variety | Thailand | 70.417 |
| W00211 | Niaw Hawm (GS.4915)       | Indica | Landrace         | Thailand | 76.449 |
| W00212 | Niaw Ubon2                | Indica | Improved variety | Thailand | 52.061 |
| W00213 | Muey Nawng 62 M           | Indica | Landrace         | Thailand | 75.838 |

|        |                    |        |                  |          |        |
|--------|--------------------|--------|------------------|----------|--------|
| W00214 | Leuang Yai         | Indica | Landrace         | Thailand | 67.085 |
| W00216 | Leuang Kha-min     | Indica | Landrace         | Thailand | 70.718 |
| W00217 | Luang Pratew 123   | Indica | Landrace         | Thailand | 81.037 |
| W00218 | Leuang Plai Lah    | Indica | Landrace         | Thailand | 64.236 |
| W00219 | Leuang Hawm        | Indica | Landrace         | Thailand | 53.425 |
| W00220 | Phare              | Indica | Landrace         | Thailand | 62.011 |
| W00222 | Khai Mod Rin 3     | Indica | Landrace         | Thailand | 74.599 |
| W00224 | RD10               | Indica | Improved variety | Thailand | 79.853 |
| W00225 | RD11               | Indica | Improved variety | Thailand | 67.532 |
| W00227 | RD27               | Indica | Improved variety | Thailand | 64.249 |
| W00228 | RD31               | Indica | Improved variety | Thailand | 74.312 |
| W00229 | RD37               | Indica | Improved variety | Thailand | 76.747 |
| W00231 | RD5                | Indica | Improved variety | Thailand | 64.568 |
| W00232 | RD6                | Indica | Improved variety | Thailand | 73.470 |
| W00233 | RD8                | Indica | Improved variety | Thailand | 65.065 |
| W00235 | Gon Gaew (GS.1698) | Indica | Landrace         | Thailand | 76.021 |
| W00236 | Goo Meuang Luang   | Indica | Landrace         | Thailand | 65.237 |
| W00241 | Khao Tah Haeng 17  | Indica | Landrace         | Thailand | 82.175 |
| W00242 | Khao Niaw Nah 432  | Indica | Landrace         | Thailand | 69.598 |
| W00243 | Khao Bun Mah       | Indica | Landrace         | Thailand | 80.825 |
| W00244 | Khao Pahn Luang    | Indica | Landrace         | Thailand | 60.999 |
| W00246 | Khi Tom Pan        | Indica | Landrace         | Thailand | 60.556 |
| W00247 | Ngah Chang         | Indica | Landrace         | Thailand | 72.178 |
| W00249 | Chai Nat 1         | Indica | Improved variety | Thailand | 78.262 |
| W00250 | Chai Nat 2         | Indica | Improved variety | Thailand | 67.543 |

|        |                     |        |                  |          |        |
|--------|---------------------|--------|------------------|----------|--------|
| W00251 | Chum Phae 60        | Indica | Improved variety | Thailand | 58.957 |
| W00253 | Daw Khao GS.5584    | Indica | Landrace         | Thailand | 56.624 |
| W00255 | Ta Pow Gaew 161     | Indica | Landrace         | Thailand | 63.529 |
| W00256 | Tab Mei Dam         | Indica | Landrace         | Thailand | 62.550 |
| W00257 | Nahng Mon S-4       | Indica | Landrace         | Thailand | 76.618 |
| W00260 | Bak Muay            | Indica | Landrace         | Thailand | 67.062 |
| W00261 | Bang Taen           | Indica | Improved variety | Thailand | 80.006 |
| W00262 | Beu Pah Toh         | Indica | Landrace         | Thailand | 62.364 |
| W00264 | Prachin Buri1       | Indica | Improved variety | Thailand | 77.987 |
| W00265 | Prachin Buri2       | Indica | Improved variety | Thailand | 77.116 |
| W00266 | Plong Aew           | Indica | Landrace         | Thailand | 65.847 |
| W00267 | Pinkaset 3          | Indica | Improved variety | Thailand | 66.802 |
| W00268 | Pin Gaew 56         | Indica | Landrace         | Thailand | 58.131 |
| W00271 | Pamah Dam           | Indica | Landrace         | Thailand | 71.577 |
| W00273 | Pahn Tawng          | Indica | Landrace         | Thailand | 72.295 |
| W00275 | Phitsanulok 60-1    | Indica | Landrace         | Thailand | 77.269 |
| W00277 | Mali Daeng          | Indica | Improved variety | Thailand | 72.575 |
| W00278 | Mali Gomen          | Indica | Landrace         | Thailand | 70.386 |
| W00281 | Look Leuang         | Indica | Landrace         | Thailand | 77.964 |
| W00282 | Look Daeng Pattani  | Indica | Landrace         | Thailand | 65.715 |
| W00283 | Sangyod             | Indica | Landrace         | Thailand | 66.943 |
| W00284 | Sangyod Phatthalung | Indica | Landrace         | Thailand | 58.969 |
| W00285 | San Pah-tawng 1     | Indica | Improved variety | Thailand | 66.717 |
| W00286 | Sin Lek             | Indica | Improved variety | Thailand | 68.500 |
| W00287 | Supanburi 60        | Indica | Improved variety | Thailand | 72.259 |
| W00288 | Supanburi 90        | Indica | Improved variety | Thailand | 75.637 |

|        |                        |        |                  |           |        |
|--------|------------------------|--------|------------------|-----------|--------|
| W00289 | Mahk Nam               | Indica | Landrace         | Thailand  | 57.165 |
| W00290 | Luang Pratan (GS.6440) | Indica | Landrace         | Thailand  | 63.838 |
| W00291 | Hom Khee Kai           | Indica | Landrace         | Thailand  | 59.462 |
| W00292 | Hawm Jan(GS.3008)      | Indica | Landrace         | Thailand  | 66.295 |
| W00293 | Hawm Dong              | Indica | Landrace         | Thailand  | 69.661 |
| W00294 | Hawm Nai Pon           | Indica | Landrace         | Thailand  | 69.337 |
| W00295 | Hawm Pamah (GS.5333)   | Indica | Landrace         | Thailand  | 64.265 |
| W00297 | Han Trah 60            | Indica | Improved variety | Thailand  | 79.769 |
| W00298 | Hahng Yi 71            | Indica | Landrace         | Thailand  | 72.062 |
| W00299 | Hah Ruang Bow          | Indica | Landrace         | Thailand  | 57.173 |
| W00300 | Ayutthaya 1            | Indica | Improved variety | Thailand  | 67.772 |
| W00301 | Niaw Hawm (GS.9194)    | Indica | Landrace         | Thailand  | 73.193 |
| W00302 | Khao Dawk Mali 105     | Indica | Landrace         | Thailand  | 66.618 |
| W00303 | Khao Tah Haeng         | Indica | Landrace         | Thailand  | 57.333 |
| W00304 | Pin Gaew               | Indica | Landrace         | Thailand  | 60.822 |
| W00305 | Pueng Tawng (GS.574)   | Indica | Landrace         | Thailand  | 53.274 |
| W00307 | Hahng Nahk             | Indica | Landrace         | Thailand  | 66.145 |
| W00308 | RD53                   | Indica | Improved variety | Thailand  | 69.864 |
| W00309 | Kon Jud                | Indica | Landrace         | Thailand  | 65.438 |
| W00310 | Kao Gam                | Indica | Landrace         | Thailand  | 65.257 |
| W00312 | Jao Khao               | Indica | Landrace         | Thailand  | 76.011 |
| W00314 | Dawk Khah              | Indica | Landrace         | Thailand  | 71.289 |
| W00315 | Daw Dawk Mai           | Indica | Landrace         | Thailand  | 73.199 |
| W00317 | Tom Meuang Luang       | Indica | Landrace         | Thailand  | 68.133 |
| W00318 | Tah-khiad              | Indica | Landrace         | Thailand  | 73.231 |
| W00320 | Nah Khawn              | Indica | Landrace         | Thailand  | 59.131 |
| W00321 | Puang Sung             | Indica | Landrace         | Thailand  | 58.130 |
| W00322 | Puang Hahng Nahk       | Indica | Landrace         | Thailand  | 65.900 |
| W00323 | Rahk Haeng             | Indica | Landrace         | Sri Lanka | 54.352 |
| W00324 | Hawm Tawng             | Indica | Landrace         | Thailand  | 58.687 |
| W00325 | Hawm Nahng Naun        | Indica | Landrace         | Thailand  | 66.908 |



|        |                          |        |                  |          |        |
|--------|--------------------------|--------|------------------|----------|--------|
| W00326 | Niaw Mali                | Indica | Landrace         | Thailand | 59.703 |
| W00327 | Leuang Kai Lah (GS.5555) | Indica | Landrace         | Thailand | 60.546 |
| W00328 | Leuang Ngahm             | Indica | Landrace         | Thailand | 62.914 |
| W00331 | CNT1-Qbph6,12(fromAB)    | Indica | Improved variety | Thailand | 59.006 |
| W00332 | CNTBR82040-259-1-1-1     | Indica | Improved variety | Thailand | 76.914 |
| W00333 | CSSL-Chr8 (106)          | Indica | Improved variety | Thailand | 58.588 |
| W00334 | HomMali802               | Indica | Improved variety | Thailand | 63.197 |
| W00335 | HomMali823               | Indica | Improved variety | Thailand | 59.966 |
| W00336 | IR4563-52-1-3-6          | Indica | Improved variety | IRRI     | 65.251 |
| W00337 | KD20                     | Indica | Improved variety | Thailand | 63.401 |
| W00338 | KDML105-Bph3-1           | Indica | Improved variety | Thailand | 62.894 |
| W00339 | TDK1_Aroma               | Indica | Improved variety | Lao PDR  | 71.524 |
| W00340 | Chiang Dao               | Indica | Landrace         | Thailand | 61.854 |
| W00341 | Gaen Jan                 | Indica | Landrace         | Thailand | 74.491 |
| W00342 | Mae Lahd                 | Indica | Landrace         | Thailand | 61.874 |
| W00343 | RD13                     | Indica | Improved variety | Thailand | 80.045 |
| W00344 | RD35                     | Indica | Improved variety | Thailand | 61.407 |
| W00345 | RD47                     | Indica | Improved variety | Thailand | 66.851 |
| W00346 | Gon Gaew (GS.6158)       | Indica | Landrace         | Thailand | 57.824 |
| W00347 | Khaw Glang               | #N/A   | Unknown          | Unknown  | 75.800 |
| W00348 | Pinkaset 1               | Indica | Improved variety | Thailand | 73.872 |
| W00350 | Sinuan                   | Indica | Landrace         | Thailand | 67.286 |
| W00351 | Hawm Daeng Noi           | Indica | Landrace         | Thailand | 60.893 |
| W00352 | E-pid                    | Indica | Improved variety | Myanmar  | 70.311 |

Supplementary Material

|        |                       |        |          |          |        |
|--------|-----------------------|--------|----------|----------|--------|
| W00354 | Daw Khao GS.12155     | Indica | Landrace | Thailand | 76.759 |
| W00356 | Hawm Pamah (GS.19843) | Indica | Landrace | Thailand | 76.522 |

---
